# Supplementary material
Source: Springer Nature journal article supplement (https://www.springermedizin.de/resource/supplementary/12974_2011_386_MOESM4_ESM.pdf/9601550)

**A**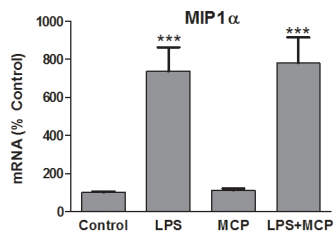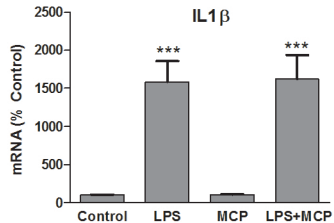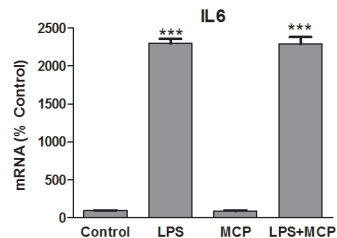**B**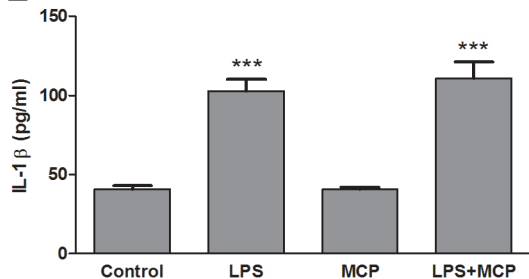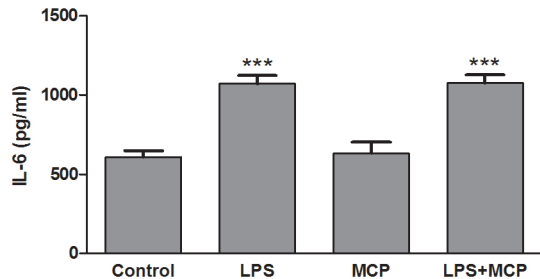

Supplement: MOESM4 [file 9601550]
